# Supplementary material for: Investigation of the active species in the carbon-supported gold catalyst for acetylene hydrochlorination
Source: Royal Society of Chemistry journal article supplement (doi:10.1039/c6cy00090h), 2016-01-01
Supplement: c6cy00090h1.pdf [file c6cy00090h1.pdf]

## Supplementary data

### **Investigation of the active species in the carbon-supported gold catalyst for acetylene hydrochlorination**

Xi Liu,<sup>1</sup> Marco Conte,<sup>1</sup> David Elias,<sup>1</sup> Li Lu,<sup>2</sup> David J. Morgan,<sup>1</sup> Simon J. Freakley,<sup>1</sup> Peter Johnston,<sup>3</sup> Christopher J. Kiely<sup>2</sup> and Graham J. Hutchings<sup>1\*</sup>

<sup>1</sup>Cardiff Catalysis Institute, School of Chemistry, Cardiff University, Cardiff, CF10 3AT

<sup>2</sup>Department of Materials Science and Engineering, Lehigh University, 5 East Packer Avenue, Bethlehem, PA 18015, USA.

<sup>3</sup>Process Technologies, Johnson Matthey plc, Orchard Road, Royston, SG8 5HE

**Table S1 XPS Quantitative Data for Figure 2**

| Catalyst            | % Au(0) |        | % Au(I) |        | % Au(III) |        |
|---------------------|---------|--------|---------|--------|-----------|--------|
|                     | BE / eV | Area % | BE / eV | Area % | BE / eV   | Area % |
| Au/H <sub>2</sub> O | 83.8    | 100    | n.d.    | n.d.   | n.d.      | n.d.   |
| Au/HCl              | 84.2    | 100    | n.d.    | n.d.   | n.d.      | n.d.   |
| Au/HNO <sub>3</sub> | 83.9    | 17.9   | 84.9    | 22.3   | 86.3      | 59.8   |
| Au/A.R.             | 83.9    | 66.7   | 85.1    | 13.5   | 86.4      | 19.8   |

n.d. = not determined.

**Table S2 XPS Quantitative Data for Figure 3**

| Au/A.R. | % Au(0) |        | % Au(I) |        | % Au(III) |        |
|---------|---------|--------|---------|--------|-----------|--------|
|         | BE / eV | Area % | BE / eV | Area % | BE / eV   | Area % |
| 0 min   | 84.0    | 52.4   | 85.0    | 8.6    | 86.5      | 39.0   |
| 10 min  | 84.3    | 72.9   | 85.3    | 16.3   | 86.6      | 10.8   |
| 60 min  | 84.3    | 78.4   | 85.2    | 15.6   | 86.6      | 6.0    |
| 300 min | 84.2    | 77.7   | 85.3    | 17.5   | 86.5      | 4.8    |

n.d. = not determined.

**Table S3 XPS Quantitative Data for Figure 8**

| Catalyst | % Au(0) |        | % Au(I) |        | % Au(III) |        |
|----------|---------|--------|---------|--------|-----------|--------|
|          | BE / eV | Area % | BE / eV | Area % | BE / eV   | Area % |
| 1        | 84.0    | 65.1   | 85.0    | 18.7   | 86.4      | 16.2   |
| 2        | 83.9    | 83.2   | n.d.    | n.d.   | 86.0      | 16.8   |
| 3        | 83.9    | 61.6   | 84.9    | 24.8   | 86.2      | 13.6   |

n.d. = not determined.
